# Supplementary material for: Romanian Bee Product Analysis: Chemical Composition, Antimicrobial Activity, and Molecular Docking Insights
Source: MDPI journal article supplement (doi:10.3390/foods13101455), 2024-05-08
Supplement: s1 [file s1]

Table 2 presents the antimicrobial activity as bacterial inhibition rate (BIR%) values. The supplementary files present the results in graphical form: the bacterial growth rate (BGR%) and bacterial inhibition rate (BIR%) for each strain (Figures S1-S15).

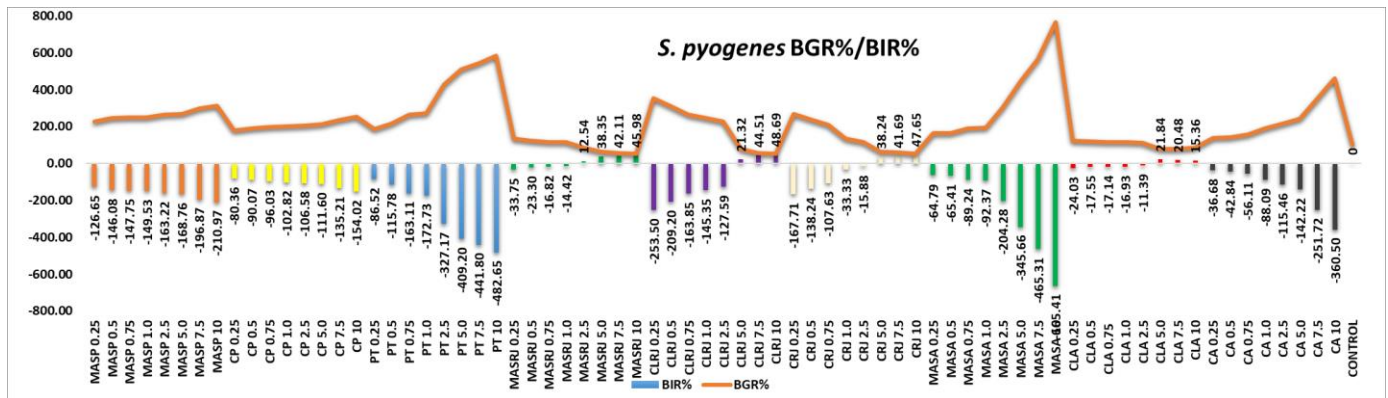

**Figure S1.** Antibacterial activity against the *S. pyogenes* strain.

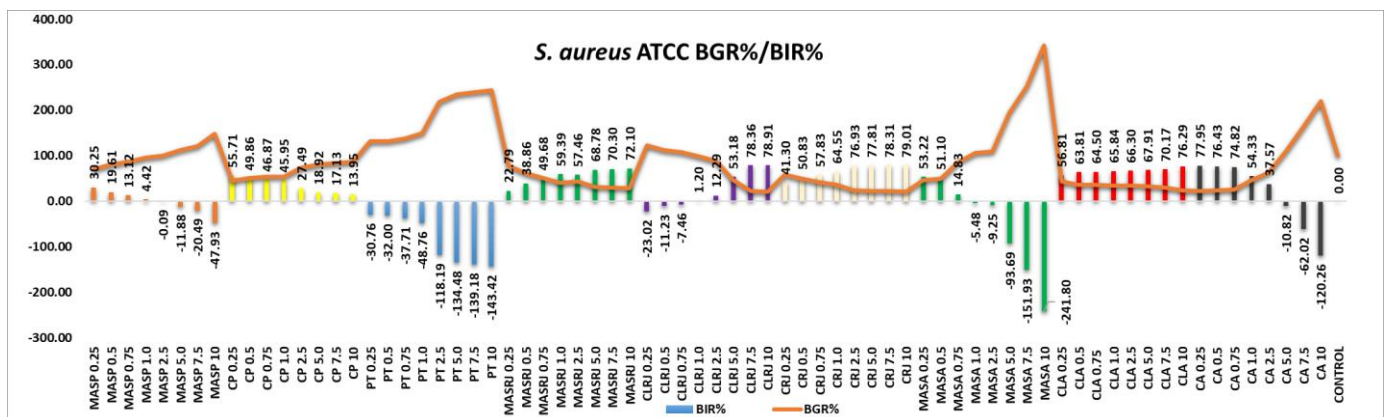

**Figure S2.** Antibacterial activity against the *S. aureus* strain.

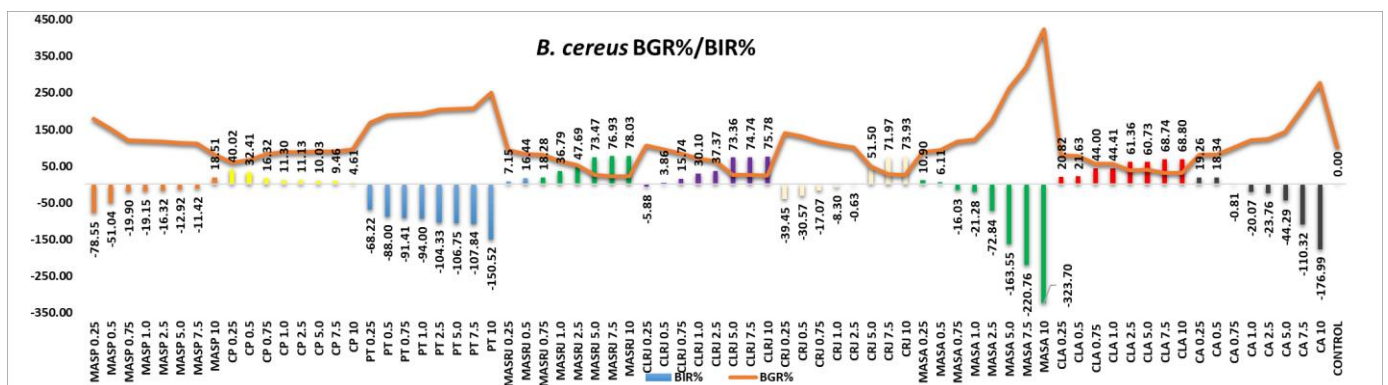

**Figure S3.** *B. cereus* - Graphical representation of the BGR% and BIR% values.

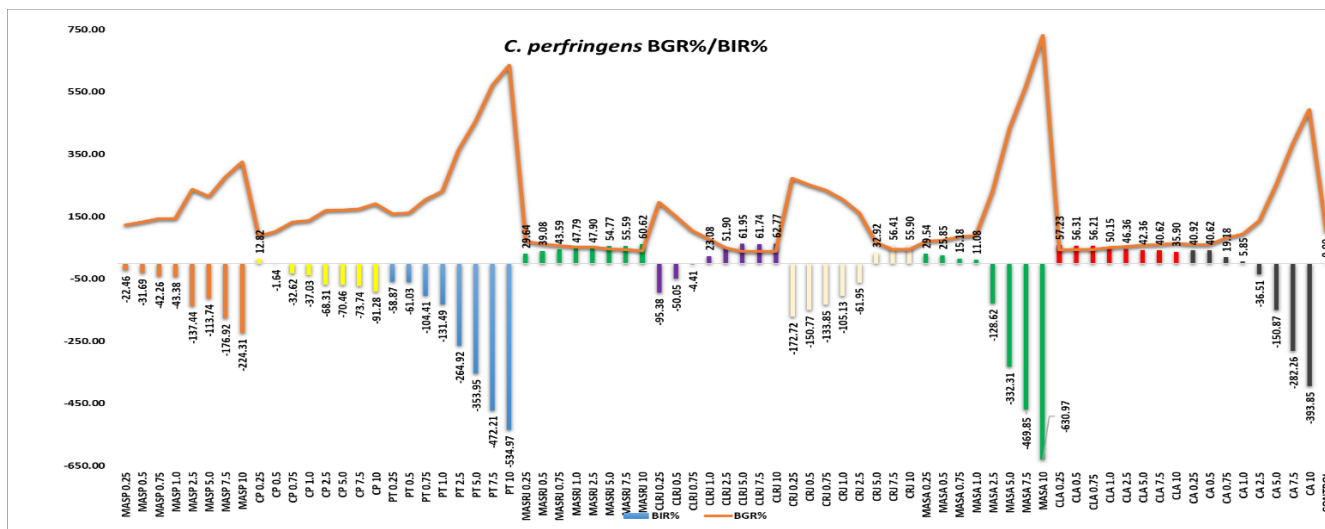

Figure S4. *C. perfringens* - Graphical representation of the BGR% and BIR% values.

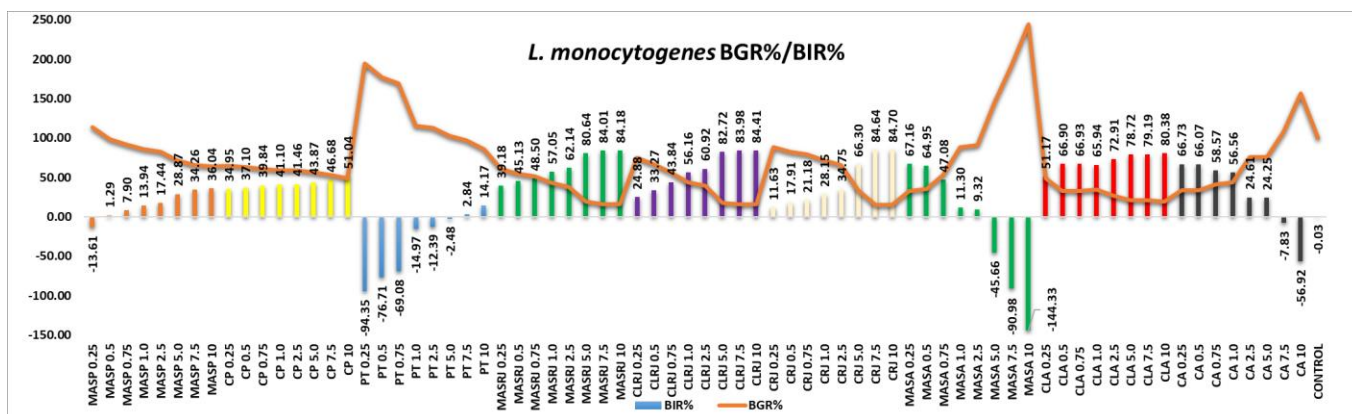

Figure S5. *L. monocytogenes* - Graphical representation of the BGR% and BIR% values.

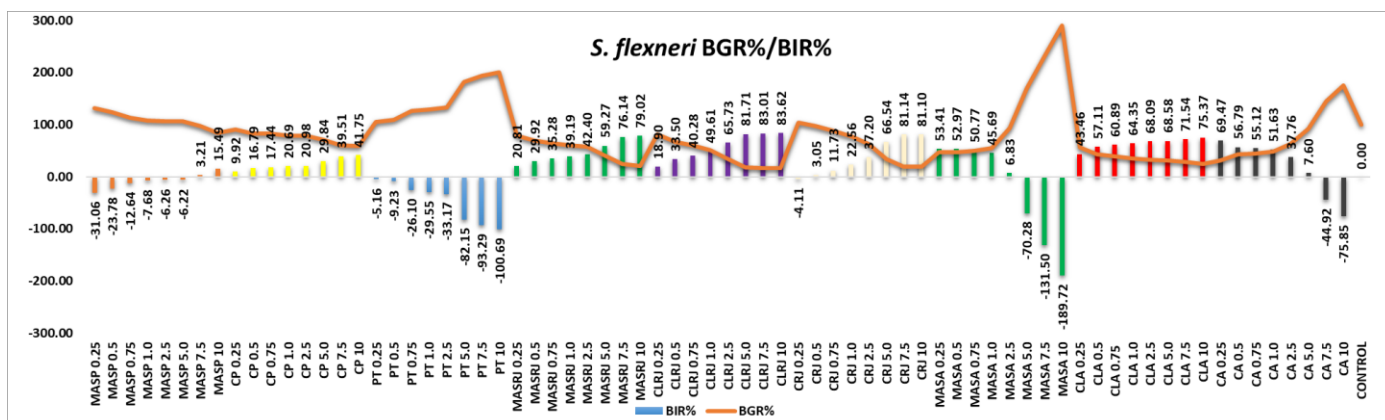

Figure S6. Antibacterial activity against the *S. flexneri* strain.

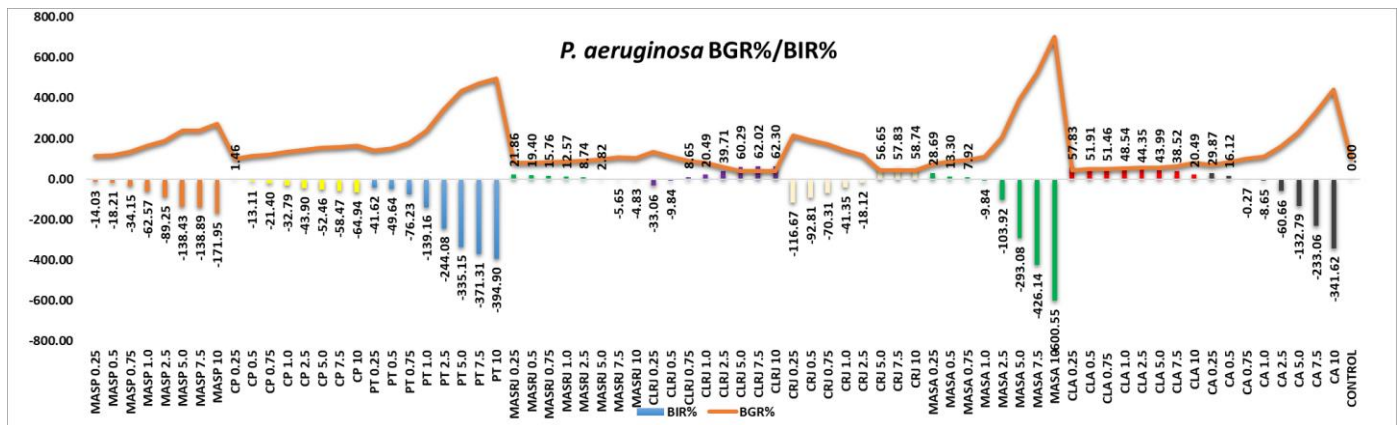

Figure S7. Antibacterial activity against the *P. aeruginosa* strain.

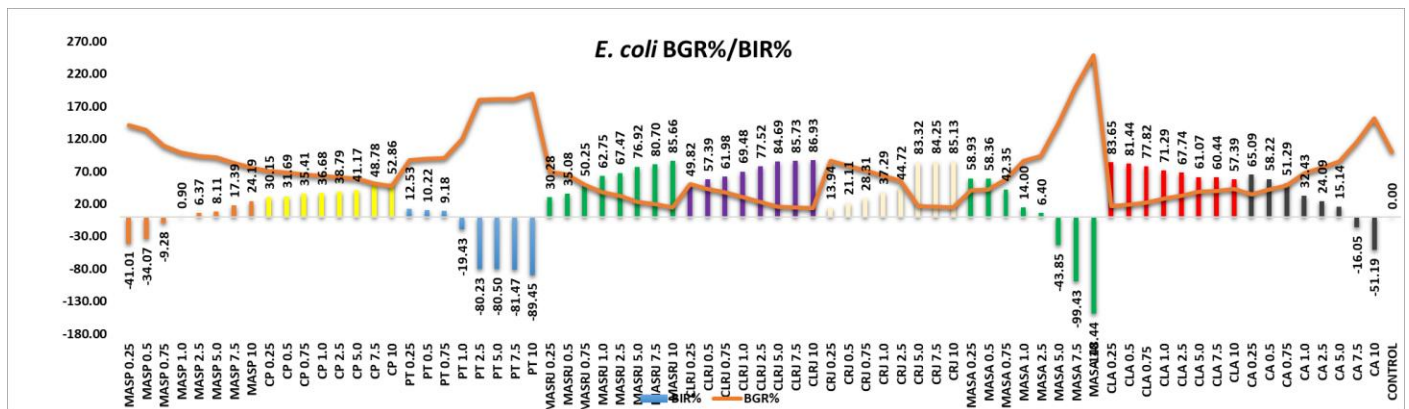

Figure S8. Antibacterial activity against the *E. coli* strain.

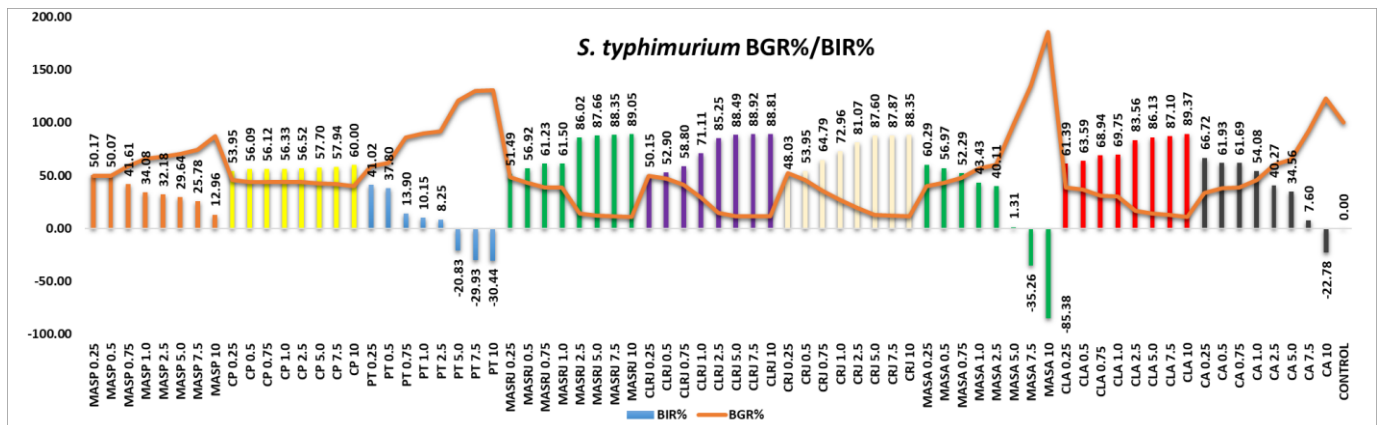

Figure S9. Antibacterial activity against the *S. typhimurium* strain.



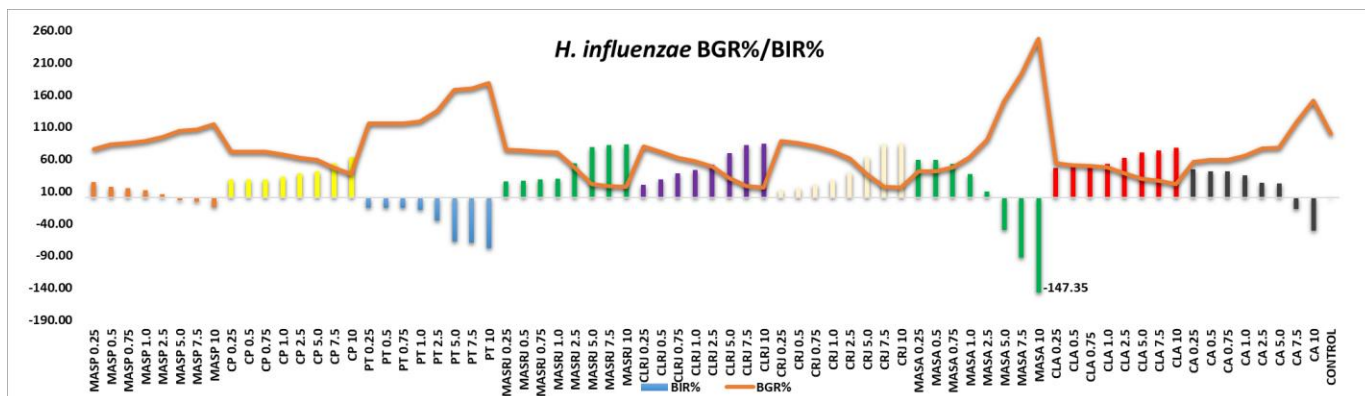

Figure S10. Graphical representation of the BGR% and BIR% values.

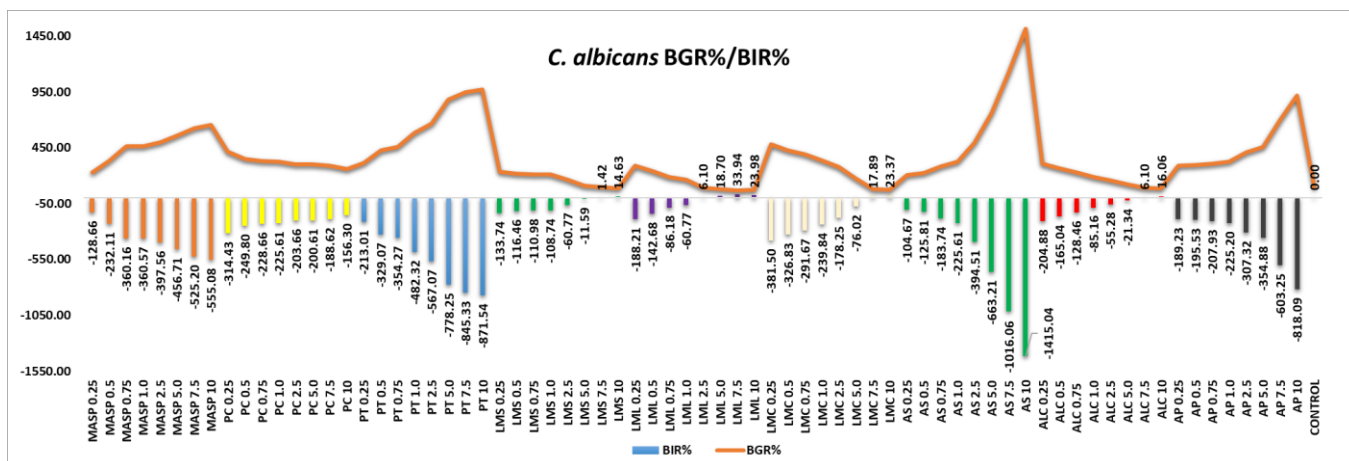

Figure S11. *C. albicans* - Graphical representation of the BGR% and BIR% values.

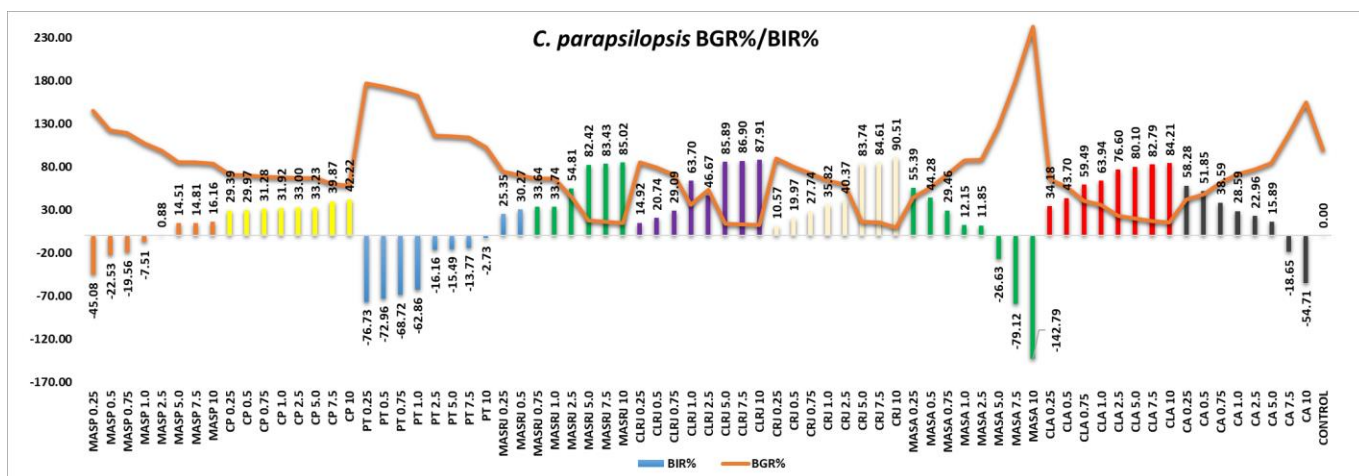

Figure S12. *C. parapsilopsis* - Graphical representation of the BGR% and BIR% values.

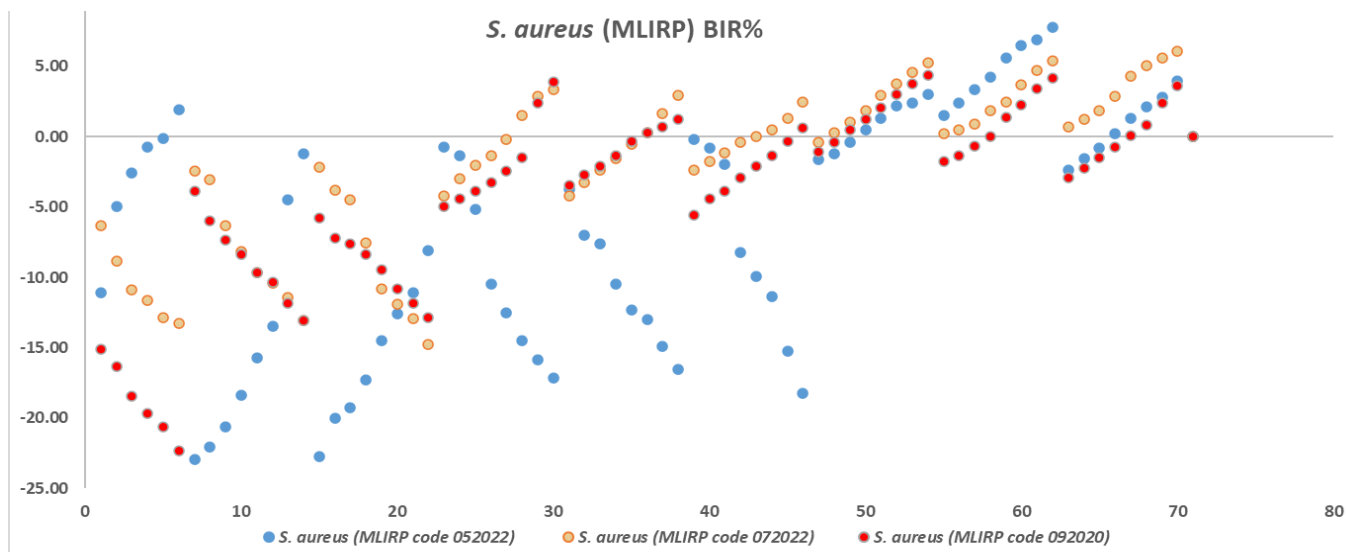

**Figure S13.** Graphical representation of BIR% of *S. aureus* isolates

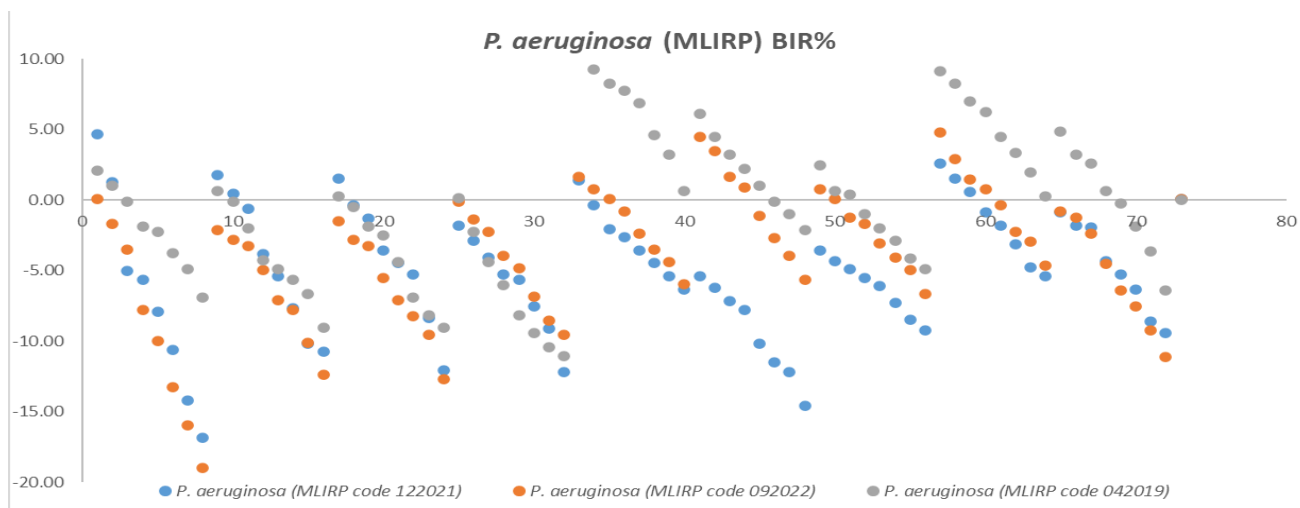

**Figure S14.** Graphical representation of BIR% of *P. aeruginosa* isolates

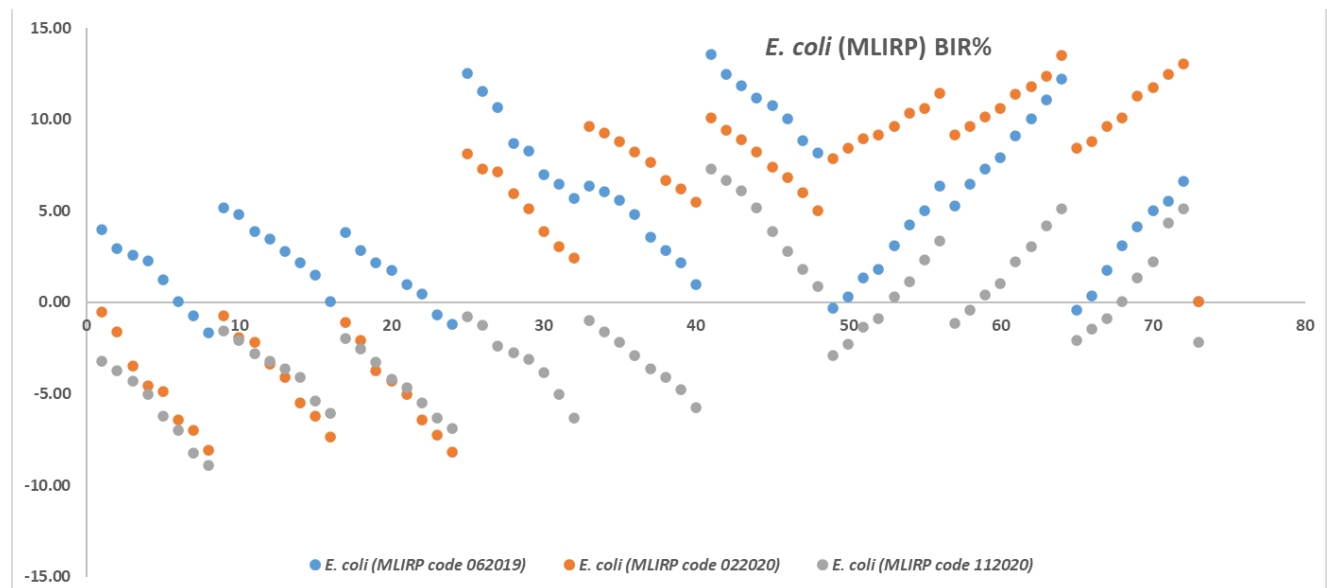

**Figure S15.** Graphical representation of BIR% of *E.coli* isolates
